# Supplementary material for: The SARM1 TIR domain produces glycocyclic ADPR molecules as minor products
Source: PubMed Central journal article supplement (PMC11025887; doi:10.1371/journal.pone.0302251), 2024-04-18
Supplement: pone.0302251.s010.pdf [file pone.0302251.s010.pdf]

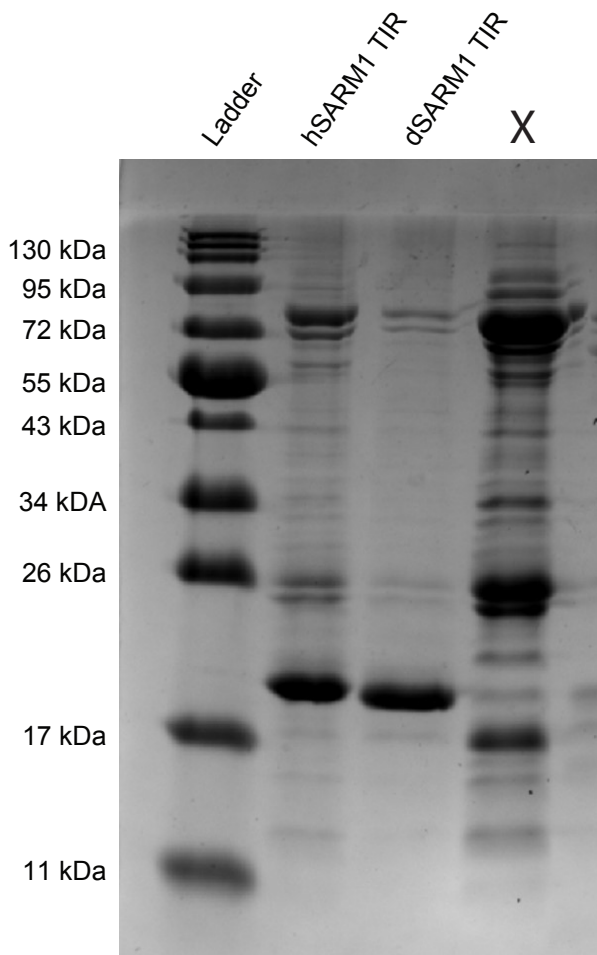

Full SDS-PAGE gell image of Fig S2.
